# Supplementary material for: First-in-human Phase I studies of PRS-080#22, a hepcidin antagonist, in healthy volunteers and patients with chronic kidney disease undergoing hemodialysis
Source: PubMed Central journal article supplement (PMC6436791; doi:10.1371/journal.pone.0212023), 2019-03-27
Supplement: pone.0212023.s008.pdf [file pone.0212023.s008.pdf]

| Parameter                | Mean                          | SD* | CV%* | Median | Range       |
|--------------------------|-------------------------------|-----|------|--------|-------------|
| Age (years)              | 36.1                          | 9.6 | 26.6 | 36.5   | 18.0-58.0   |
| Height (cm)              | 177.2                         | 7.1 | 4.0  | 178.0  | 157.0-192.0 |
| Weight (kg)              | 76.8                          | 9.3 | 18.3 | 80.0   | 60.1-90.0   |
| BMI (kg/m <sup>2</sup> ) | 24.5                          | 2.0 | 8.2  | 24.6   | 20.4-28.8   |
| Gender                   | All volunteers were male      |     |      |        |             |
| Race                     | All volunteers were caucasian |     |      |        |             |

\*SD: standard deviation, CV: coefficient of variation
