# Supplementary material for: First-in-human Phase I studies of PRS-080#22, a hepcidin antagonist, in healthy volunteers and patients with chronic kidney disease undergoing hemodialysis
Source: PubMed Central journal article supplement (PMC6436791; doi:10.1371/journal.pone.0212023), 2019-03-27
Supplement: pone.0212023.s009.pdf [file pone.0212023.s009.pdf]

| Parameter                | Mean                  | SD    | 1st quartile | median            | 3rd quartile | Range      |
|--------------------------|-----------------------|-------|--------------|-------------------|--------------|------------|
| Age (years)              | 55.4                  | 14.1  | 47.0         | 60.0              | 65.0         | 28-72      |
| Height (cm)              | 170.0                 | 9.2   | 163.0        | 170.0             | 178.0        | 150-185    |
| Weight (kg)              | 77.05                 | 14.43 | 66.3         | 77.9              | 84.8         | 50.0-107.4 |
| BMI (kg/m <sup>2</sup> ) | 26.6                  | 4.9   | 22.7         | 25.1              | 30.5         | 18.3-35.5  |
| Albumine (g/dL)          | 4.2                   | 0.4   | 3.9          | 4.1               | 4.3          | 3.6-4.9    |
| Creatinine (mg/dL)       | 8.6                   | 2.8   | 6.6          | 8.4               | 10.5         | 4.2-14.5   |
| Iron (µg/dL)             | 85.5                  | 39.0  | 57.5         | 72.0              | 106.0        | 29-175     |
| Ferritin (ng/mL)         | 732.7                 | 347.1 | 438.0        | 707.5             | 900.0        | 265-1469   |
| Gender                   | Male: 17 (70.8%)      |       |              | Female: 7 (29.2%) |              |            |
| Race                     | Caucasian: 23 (95.8%) |       |              | Other: 1 (4.2%)   |              |            |
