# Supplementary material for: First-in-human Phase I studies of PRS-080#22, a hepcidin antagonist, in healthy volunteers and patients with chronic kidney disease undergoing hemodialysis
Source: PubMed Central journal article supplement (PMC6436791; doi:10.1371/journal.pone.0212023), 2019-03-27
Supplement: pone.0212023.s010.pdf [file pone.0212023.s010.pdf]

## Free Anticalin

| Parameter                      | Statistics | 0.08 mg<br>(N=6) | 0.4 mg<br>(N=6) | 1.2 mg<br>(N=6) | 4 mg<br>(N=6) | 8 mg<br>(N=6) | 16 mg<br>(N=6) |
|--------------------------------|------------|------------------|-----------------|-----------------|---------------|---------------|----------------|
| AUC <sub>0</sub> [h*µg/mL]     | n          | 6                | 6               | 6               | 6             | 6             | 6              |
|                                | Mean       | 14.275           | 134.183         | 874.805         | 4955.308      | 10841.729     | 19609.450      |
|                                | SD         | 1.7972           | 69.8435         | 527.5168        | 2365.6970     | 3932.4456     | 6324.7357      |
|                                | CV%        | 12.6             | 52.1            | 60.3            | 47.7          | 36.3          | 32.3           |
|                                | Minimum    | 11.69            | 81.39           | 323.70          | 2351.31       | 6082.81       | 8591.28        |
|                                | Median     | 14.230           | 111.479         | 758.020         | 4698.254      | 10788.812     | 20407.231      |
|                                | Maximum    | 16.35            | 265.40          | 1739.71         | 7660.54       | 15477.92      | 26364.24       |
|                                | Geom. Mean | 14.179           | 122.255         | 748.160         | 4459.664      | 10216.402     | 18496.712      |
|                                | Geom. CV%  | 12.9             | 47.5            | 68.7            | 55.0          | 40.0          | 42.3           |
| AUC <sub>0-inf</sub> [h*µg/mL] | n          | 5                | 2               | 5               | 6             | 5             | 5              |
|                                | Mean       | 17.772           | 215.065         | 883.809         | 5144.200      | 11052.073     | 22383.549      |
|                                | SD         | 2.3973           | 73.4732         | 686.1691        | 2585.1175     | 4961.6654     | 4363.5218      |
|                                | CV%        | 13.5             | 34.2            | 77.6            | 50.3          | 44.9          | 19.5           |
|                                | Minimum    | 14.18            | 163.11          | 333.92          | 2372.65       | 6128.16       | 17327.70       |
|                                | Median     | 18.167           | 215.065         | 583.745         | 4727.800      | 8912.955      | 20810.650      |
|                                | Maximum    | 20.78            | 267.02          | 2040.47         | 8249.13       | 17126.66      | 28580.96       |
|                                | Geom. Mean | 17.637           | 208.696         | 718.240         | 4580.755      | 10185.439     | 22051.377      |
|                                | Geom. CV%  | 14.1             | 35.9            | 78.9            | 57.9          | 47.6          | 19.4           |
| C <sub>max</sub> [µg/mL]       | n          | 6                | 6               | 6               | 6             | 6             | 6              |
|                                | Mean       | 0.7087           | 9.1283          | 29.2167         | 117.6833      | 205.0000      | 404.5000       |
|                                | SD         | 0.58488          | 0.94529         | 5.65665         | 27.80593      | 39.91491      | 84.41268       |
|                                | CV%        | 82.5             | 10.4            | 19.4            | 23.6          | 19.5          | 20.9           |
|                                | Minimum    | 0.225            | 7.720           | 21.500          | 81.900        | 159.000       | 305.000        |
|                                | Median     | 0.4870           | 9.1750          | 31.4000         | 121.5000      | 196.5000      | 410.5000       |
|                                | Maximum    | 1.550            | 10.300          | 35.700          | 158.000       | 277.000       | 533.000        |
|                                | Geom. Mean | 0.5111           | 9.0866          | 28.7270         | 114.8727      | 202.0090      | 397.1909       |
|                                | Geom. CV%  | 112.8            | 10.6            | 20.8            | 24.7          | 18.6          | 21.2           |
| T <sub>max</sub> [h]           | n          | 6                | 6               | 6               | 6             | 6             | 6              |
|                                | Mean       | 2.0000           | 2.1723          | 2.8362          | 4.0000        | 2.8333        | 2.3333         |
|                                | SD         | 0.00000          | 0.41386         | 0.75356         | 2.96648       | 1.60208       | 0.51640        |
|                                | CV%        | 0.0              | 19.1            | 26.6            | 74.2          | 56.5          | 22.1           |
|                                | Minimum    | 2.000            | 2.000           | 2.000           | 2.000         | 2.000         | 2.000          |
|                                | Maximum    | 2.0000           | 2.0000          | 3.0000          | 3.0000        | 2.0000        | 2.0000         |

| Parameter  | Statistics | 0.08 mg<br>(N=6) | 0.4 mg<br>(N=6) | 1.2 mg<br>(N=6) | 4 mg<br>(N=6) | 8 mg<br>(N=6) | 16 mg<br>(N=6) |
|------------|------------|------------------|-----------------|-----------------|---------------|---------------|----------------|
| t1/2 [h]   | n          | 5                | 2               | 5               | 6             | 5             | 5              |
|            | Mean       | 112.243          | 57.000          | 63.772          | 46.295        | 51.304        | 42.365         |
|            | SD         | 15.6437          | 58.8928         | 18.4769         | 14.5432       | 25.9799       | 13.5324        |
|            | CV%        | 13.8             | 103.3           | 29.0            | 31.4          | 50.6          | 31.9           |
|            | Minimum    | 99.50            | 15.36           | 40.12           | 32.64         | 31.25         | 33.88          |
|            | Median     | 108.323          | 57.000          | 64.432          | 39.017        | 34.695        | 36.452         |
|            | Maximum    | 138.39           | 98.64           | 90.25           | 67.77         | 87.34         | 66.23          |
|            | Geom. Mean | 112.430          | 38.920          | 61.589          | 44.563        | 46.529        | 40.965         |
|            | Geom. CV%  | 13.3             | 215.4           | 30.6            | 30.3          | 51.5          | 28.1           |
|            | Vss [L/kg] | n                | 5               | 2               | 5             | 6             | 5              |
| Mean       |            | 0.59097          | 0.09209         | 0.08941         | 0.04645       | 0.04704       | 0.04810        |
| SD         |            | 0.116070         | 0.072267        | 0.038254        | 0.015609      | 0.009330      | 0.003070       |
| CV%        |            | 19.6             | 78.5            | 42.8            | 33.6          | 19.8          | 6.4            |
| Minimum    |            | 0.4211           | 0.0410          | 0.0581          | 0.0320        | 0.0331        | 0.0443         |
| Median     |            | 0.60365          | 0.09209         | 0.07026         | 0.04158       | 0.04793       | 0.04690        |
| Maximum    |            | 0.7196           | 0.1432          | 0.1531          | 0.0767        | 0.0572        | 0.0520         |
| Geom. Mean |            | 0.58115          | 0.07662         | 0.08395         | 0.04467       | 0.04623       | 0.04802        |
| Geom. CV%  |            | 21.2             | 108.9           | 39.7            | 30.0          | 21.5          | 6.4            |

## Total Anticalin

| Parameter                                   | Statistics | 0.08 mg<br>(N=6) | 0.4 mg<br>(N=6) | 1.2 mg<br>(N=6) | 4 mg<br>(N=6) | 8 mg<br>(N=6) | 16 mg<br>(N=6) |
|---------------------------------------------|------------|------------------|-----------------|-----------------|---------------|---------------|----------------|
| AUC <sub>0-∞</sub> [h <sup>2</sup> µg/mL]   | n          | 6                | 6               | 6               | 6             | 6             | 6              |
|                                             | Mean       | 141.5            | 680.6           | 2264.3          | 7490.5        | 15065.8       | 25572.2        |
|                                             | SD         | 15.29            | 105.59          | 167.47          | 730.35        | 2495.62       | 4074.59        |
|                                             | CV%        | 10.8             | 15.5            | 7.4             | 9.8           | 16.6          | 15.9           |
|                                             | Minimum    | 122              | 550             | 2060            | 6380          | 12363         | 17664          |
|                                             | Median     | 140.0            | 674.3           | 2298.8          | 7750.4        | 14195.3       | 26704.1        |
|                                             | Maximum    | 162              | 867             | 2509            | 8281          | 18295         | 29110          |
|                                             | Geom. Mean | 140.8            | 674.1           | 2259.1          | 7459.7        | 14898.8       | 25253.3        |
|                                             | Geom. CV%  | 10.8             | 15.1            | 7.4             | 10.1          | 16.4          | 18.3           |
| AUC <sub>0-inf</sub> [h <sup>2</sup> µg/mL] | n          | 6                | 6               | 6               | 6             | 6             | 5              |
|                                             | Mean       | 161.6            | 761.0           | 2570.1          | 8308.1        | 17131.9       | 27659.7        |
|                                             | SD         | 17.41            | 162.69          | 255.43          | 922.14        | 2836.67       | 4378.82        |
|                                             | CV%        | 10.8             | 21.4            | 9.9             | 11.1          | 16.6          | 15.8           |
|                                             | Minimum    | 140              | 599             | 2286            | 6744          | 14145         | 20029          |
|                                             | Median     | 163.2            | 706.6           | 2581.2          | 8617.3        | 16436.6       | 29183.0        |
|                                             | Maximum    | 183              | 1069            | 2975            | 9164          | 20601         | 30926          |
|                                             | Geom. Mean | 160.8            | 748.2           | 2559.7          | 8262.6        | 16939.5       | 27339.3        |
|                                             | Geom. CV%  | 10.9             | 19.8            | 9.9             | 11.7          | 16.5          | 17.9           |
| C <sub>max</sub> [µg/mL]                    | n          | 6                | 6               | 6               | 6             | 6             | 6              |
|                                             | Mean       | 2.092            | 10.590          | 33.900          | 120.383       | 246.333       | 366.167        |
|                                             | SD         | 0.3162           | 1.6193          | 4.3945          | 19.5469       | 56.7615       | 40.8726        |
|                                             | CV%        | 15.1             | 15.3            | 13.0            | 16.2          | 23.0          | 11.2           |
|                                             | Minimum    | 1.51             | 9.13            | 28.80           | 92.30         | 176.00        | 287.00         |
|                                             | Median     | 2.195            | 9.980           | 33.900          | 121.500       | 239.500       | 376.500        |
|                                             | Maximum    | 2.36             | 13.50           | 39.90           | 143.00        | 322.00        | 401.00         |
|                                             | Geom. Mean | 2.069            | 10.495          | 33.663          | 119.012       | 240.882       | 364.050        |
|                                             | Geom. CV%  | 16.8             | 14.5            | 13.0            | 16.9          | 23.6          | 12.2           |
| T <sub>max</sub> [h]                        | n          | 6                | 6               | 6               | 6             | 6             | 6              |
|                                             | Mean       | 2.8333           | 3.3333          | 2.6695          | 3.6667        | 4.3333        | 3.0000         |
|                                             | SD         | 0.40825          | 1.63299         | 0.81791         | 3.14113       | 2.80476       | 0.63246        |
|                                             | CV%        | 14.4             | 49.0            | 30.6            | 85.7          | 64.7          | 21.1           |
|                                             | Minimum    | 2.000            | 2.000           | 2.000           | 2.000         | 3.000         | 2.000          |
|                                             | Maximum    | 3.0000           | 3.0000          | 2.5000          | 2.5000        | 3.0000        | 3.0000         |
|                                             |            | 3.000            | 6.000           | 4.000           | 10.000        | 10.000        | 4.000          |

| Parameter              | Statistics | 0.08 mg<br>(N=6) | 0.4 mg<br>(N=6) | 1.2 mg<br>(N=6) | 4 mg<br>(N=6) | 8 mg<br>(N=6) | 16 mg<br>(N=6) |
|------------------------|------------|------------------|-----------------|-----------------|---------------|---------------|----------------|
| t <sub>1/2</sub> [h]   | n          | 6                | 6               | 6               | 6             | 6             | 5              |
|                        | Mean       | 81.223           | 70.477          | 80.253          | 73.112        | 79.643        | 80.202         |
|                        | SD         | 8.7443           | 27.6715         | 10.3387         | 8.9319        | 9.6881        | 11.5771        |
|                        | CV%        | 10.8             | 39.3            | 12.9            | 12.2          | 12.2          | 14.4           |
|                        | Minimum    | 66.62            | 21.75           | 68.52           | 60.33         | 71.82         | 62.95          |
|                        | Median     | 82.728           | 73.791          | 80.964          | 75.813        | 75.740        | 81.950         |
|                        | Maximum    | 92.60            | 104.87          | 91.95           | 81.84         | 98.25         | 92.55          |
|                        | Geom. Mean | 80.813           | 63.770          | 79.691          | 72.638        | 79.194        | 79.494         |
|                        | Geom. CV%  | 11.2             | 59.8            | 13.1            | 12.7          | 11.4          | 15.2           |
| V <sub>ss</sub> [L/kg] | n          | 6                | 6               | 6               | 6             | 6             | 5              |
|                        | Mean       | 0.05622          | 0.05416         | 0.05132         | 0.04784       | 0.05330       | 0.06457        |
|                        | SD         | 0.007985         | 0.009765        | 0.004079        | 0.005578      | 0.009250      | 0.014573       |
|                        | CV%        | 14.2             | 18.0            | 7.9             | 11.7          | 17.4          | 22.6           |
|                        | Minimum    | 0.0466           | 0.0363          | 0.0436          | 0.0407        | 0.0406        | 0.0476         |
|                        | Median     | 0.05439          | 0.05549         | 0.05245         | 0.04766       | 0.05522       | 0.06171        |
|                        | Maximum    | 0.0688           | 0.0640          | 0.0548          | 0.0549        | 0.0652        | 0.0869         |
|                        | Geom. Mean | 0.05577          | 0.05331         | 0.05118         | 0.04757       | 0.05260       | 0.06331        |
|                        | Geom. CV%  | 14.0             | 20.5            | 8.4             | 11.8          | 18.1          | 22.4           |

AUC<sub>2</sub>: AUC by trapezoidal rule, 0 – last quantifiable sample, AUC<sub>-inf</sub>: AUC by trapezoidal rule, extrapolated to infinity, C<sub>max</sub>: observed maximal concentration, T<sub>max</sub>: time of observed maximum concentration, t<sub>1/2</sub>: terminal half-life, V<sub>ss</sub>: volume of distribution during the terminal phase
