# Supplementary material for: First-in-human Phase I studies of PRS-080#22, a hepcidin antagonist, in healthy volunteers and patients with chronic kidney disease undergoing hemodialysis
Source: PubMed Central journal article supplement (PMC6436791; doi:10.1371/journal.pone.0212023), 2019-03-27
Supplement: pone.0212023.s011.pdf [file pone.0212023.s011.pdf]

## Free Anticalin

| Parameter          | Statistics | Treatment |          |           |         |
|--------------------|------------|-----------|----------|-----------|---------|
|                    |            | 2 mg/kg   | 4 mg/kg  | 8 mg/kg   |         |
| AUC0-t [h*µg/mL]   | n          | 6         | 6        | 6         |         |
|                    | Mean       | 513.190   | 1876.459 | 4432.260  |         |
|                    | SD         | 182.9286  | 919.2034 | 1470.3440 |         |
|                    | CV%        | 35.6      | 49.0     | 33.2      |         |
|                    | Minimum    | 278.01    | 1031.22  | 2960.93   |         |
|                    | Median     | 514.584   | 1663.782 | 4088.269  |         |
|                    | Maximum    | 759.78    | 3498.85  | 6778.05   |         |
|                    | Geom. n    | 6         | 6        | 6         |         |
|                    | Geom. Mean | 484.267   | 1713.093 | 4242.349  |         |
|                    | Geom. SD   | 1.4661    | 1.5820   | 1.3782    |         |
|                    | Geom. CV%  | 39.7      | 48.4     | 32.9      |         |
| AUC0-inf [h*µg/mL] | n          | 5         | 6        | 5         |         |
|                    | Mean       | 489.835   | 1921.713 | 4743.166  |         |
|                    | SD         | 166.4978  | 918.1360 | 1496.5637 |         |
|                    | CV%        | 34.0      | 47.8     | 31.6      |         |
|                    | Minimum    | 289.64    | 1111.11  | 3051.44   |         |
|                    | Median     | 537.182   | 1688.588 | 4409.445  |         |
|                    | Maximum    | 708.23    | 3558.37  | 6863.88   |         |
|                    | Geom. n    | 5         | 6        | 5         |         |
|                    | Geom. Mean | 466.056   | 1765.027 | 4558.198  |         |
|                    | Geom. SD   | 1.4329    | 1.5541   | 1.3713    |         |
|                    | Geom. CV%  | 37.2      | 46.3     | 32.4      |         |
| Cmax [µg/mL]       | n          | 6         | 6        | 6         |         |
|                    | Mean       | 29.72     | 174.1    | 164.0     |         |
|                    | SD         | 6.8221    | 154.69   | 41.718    |         |
|                    | CV%        | 23.0      | 88.8     | 25.4      |         |
|                    | Minimum    | 19.3      | 40.1     | 118       |         |
|                    | Median     | 29.80     | 112.0    | 158.0     |         |
|                    | Maximum    | 38.1      | 458      | 213       |         |
|                    | Geom. n    | 6         | 6        | 6         |         |
|                    | Geom. Mean | 29.01     | 128.4    | 159.6     |         |
|                    | Geom. SD   | 1.2786    | 2.3441   | 1.2913    |         |
|                    | Geom. CV%  | 25.0      | 103.3    | 26.0      |         |
| Tmax [h]           | n          | 6         | 6        | 6         |         |
|                    | Mean       | 1.6888    | 1.0110   | 1.6833    |         |
|                    | SD         | 1.64669   | 0.01704  | 1.62515   |         |
|                    | CV%        | 97.5      | 1.7      | 96.5      |         |
|                    | Minimum    | 1.000     | 1.000    | 1.000     |         |
|                    | Median     | 1.0250    | 1.0000   | 1.0085    |         |
|                    | Maximum    | 5.050     | 1.033    | 5.000     |         |
|                    | Geom. SD   | 1.92436   | 1.01691  | 1.91535   |         |
|                    | Geom. CV%  | 73.1      | 1.7      | 72.5      |         |
|                    | t1/2 [h]   | n         | 5        | 6         | 5       |
|                    |            | Mean      | 293.201  | 259.676   | 231.189 |
| SD                 |            | 77.0581   | 70.4599  | 99.5855   |         |
| CV%                |            | 26.3      | 27.1     | 43.1      |         |
| Minimum            |            | 235.68    | 161.25   | 163.45    |         |
| Median             |            | 252.876   | 253.226  | 192.274   |         |
| Maximum            |            | 420.54    | 369.17   | 407.38    |         |
| Geom. n            |            | 5         | 6        | 5         |         |
| Geom. Mean         |            | 286.080   | 251.551  | 218.080   |         |
| Geom. SD           |            | 1.2721    | 1.3231   | 1.4313    |         |
| Geom. CV%          |            | 24.4      | 28.6     | 37.0      |         |
| Vss [L/kg]         | n          | 5         | 6        | 5         |         |
|                    | Mean       | 0.54779   | 0.21398  | 0.11579   |         |
|                    | SD         | 0.234089  | 0.179132 | 0.051186  |         |
|                    | CV%        | 42.7      | 83.7     | 44.2      |         |
|                    | Minimum    | 0.2821    | 0.0731   | 0.0708    |         |
|                    | Median     | 0.56756   | 0.13814  | 0.09013   |         |
|                    | Maximum    | 0.8729    | 0.5267   | 0.1969    |         |
|                    | Geom. n    | 5         | 6        | 5         |         |
|                    | Geom. Mean | 0.50653   | 0.16309  | 0.10790   |         |
|                    | Geom. SD   | 1.570466  | 2.205106 | 1.505674  |         |
|                    | Geom. CV%  | 47.5      | 93.2     | 42.7      |         |

## Total Anticalin

| Parameter                      | Statistics           | Treatment |          |           |
|--------------------------------|----------------------|-----------|----------|-----------|
|                                |                      | 2 mg/kg   | 4 mg/kg  | 8 mg/kg   |
| AUC <sub>0-t</sub> [h*µg/mL]   | n                    | 6         | 6        | 6         |
|                                | Mean                 | 7141.09   | 16997.51 | 33961.94  |
|                                | SD                   | 1972.195  | 5117.045 | 8361.271  |
|                                | CV%                  | 27.6      | 30.1     | 24.6      |
|                                | Minimum              | 5040.9    | 8250.7   | 28423.3   |
|                                | Median               | 6982.28   | 17786.22 | 31121.63  |
|                                | Maximum              | 9459.0    | 23611.7  | 50814.6   |
|                                | Geom. n              | 6         | 6        | 6         |
|                                | Geom. Mean           | 6911.75   | 16204.60 | 33265.05  |
|                                | Geom. SD             | 1.325     | 1.435    | 1.236     |
|                                | Geom. CV%            | 28.7      | 37.3     | 21.5      |
| AUC <sub>0-inf</sub> [h*µg/mL] | n                    | 6         | 4        | 6         |
|                                | Mean                 | 8507.06   | 19839.83 | 41589.51  |
|                                | SD                   | 2185.379  | 6987.032 | 11009.413 |
|                                | CV%                  | 25.7      | 35.2     | 26.5      |
|                                | Minimum              | 6139.8    | 9841.0   | 34927.4   |
|                                | Median               | 8612.93   | 21692.78 | 36489.19  |
|                                | Maximum              | 11122.1   | 26132.8  | 63416.3   |
|                                | Geom. n              | 6         | 4        | 6         |
|                                | Geom. Mean           | 8267.91   | 18651.44 | 40601.11  |
|                                | Geom. SD             | 1.302     | 1.545    | 1.257     |
|                                | Geom. CV%            | 26.8      | 45.7     | 23.2      |
| C <sub>max</sub> [µg/mL]       | n                    | 6         | 6        | 6         |
|                                | Mean                 | 44.67     | 281.9    | 255.0     |
|                                | SD                   | 13.768    | 231.35   | 116.73    |
|                                | CV%                  | 30.8      | 82.1     | 45.8      |
|                                | Minimum              | 28.9      | 61.1     | 137       |
|                                | Median               | 42.50     | 183.0    | 238.0     |
|                                | Maximum              | 69.4      | 681      | 434       |
|                                | Geom. n              | 6         | 6        | 6         |
|                                | Geom. Mean           | 43.06     | 211.6    | 233.3     |
|                                | Geom. SD             | 1.3390    | 2.3390   | 1.5913    |
|                                | Geom. CV%            | 29.8      | 102.9    | 49.1      |
| T <sub>max</sub> [h]           | n                    | 6         | 6        | 6         |
|                                | Mean                 | 4.8998    | 1.6777   | 4.9750    |
|                                | SD                   | 7.72677   | 1.64382  | 7.93151   |
|                                | CV%                  | 157.7     | 98.0     | 159.4     |
|                                | Minimum              | 1.000     | 1.000    | 1.000     |
|                                | Median               | 1.0330    | 1.0000   | 1.0085    |
|                                | Maximum              | 20.333    | 5.033    | 20.833    |
|                                | Geom. SD             | 3.54426   | 1.92941  | 3.59537   |
|                                | Geom. CV%            | 199.0     | 73.5     | 203.5     |
|                                | t <sub>1/2</sub> [h] | n         | 6        | 4         |
| Mean                           |                      | 265.135   | 239.656  | 275.823   |
| SD                             |                      | 59.1592   | 38.9693  | 66.4025   |
| CV%                            |                      | 22.3      | 16.3     | 24.1      |
| Minimum                        |                      | 192.04    | 203.43   | 225.11    |
| Median                         |                      | 257.574   | 230.860  | 246.640   |
| Maximum                        |                      | 368.53    | 293.47   | 404.05    |
| Geom. n                        |                      | 6         | 4        | 6         |
| Geom. Mean                     |                      | 259.947   | 237.397  | 270.190   |
| Geom. SD                       |                      | 1.2408    | 1.1702   | 1.2385    |
|                                | Geom. CV%            | 21.8      | 15.8     | 21.6      |
| V <sub>ss</sub> [L/kg]         | n                    | 6         | 4        | 6         |
|                                | Mean                 | 0.08866   | 0.07563  | 0.07328   |
|                                | SD                   | 0.028216  | 0.047482 | 0.019824  |
|                                | CV%                  | 31.8      | 62.8     | 27.1      |
|                                | Minimum              | 0.0624    | 0.0394   | 0.0519    |
|                                | Median               | 0.08163   | 0.05906  | 0.06750   |
|                                | Maximum              | 0.1222    | 0.1450   | 0.1096    |
|                                | Geom. n              | 6         | 4        | 6         |
|                                | Geom. Mean           | 0.08501   | 0.06661  | 0.07129   |
|                                | Geom. SD             | 1.372967  | 1.749253 | 1.285246  |
|                                | Geom. CV%            | 32.5      | 60.6     | 25.5      |

AUC<sub>0-t</sub>: AUC by trapezoidal rule, 0 – last quantifiable sample, AUC<sub>0-inf</sub>: AUC by trapezoidal rule, extrapolated to infinity, C<sub>max</sub>: observed maximal concentration, T<sub>max</sub>: time of observed maximum concentration, t<sub>1/2</sub>: terminal half-life, V<sub>ss</sub>: volume of distribution during the terminal phase
