# Supplementary material for: First-in-human Phase I studies of PRS-080#22, a hepcidin antagonist, in healthy volunteers and patients with chronic kidney disease undergoing hemodialysis
Source: PubMed Central journal article supplement (PMC6436791; doi:10.1371/journal.pone.0212023), 2019-03-27
Supplement: pone.0212023.s012.pdf [file pone.0212023.s012.pdf]

| Time    | CKD patients  |           |                |           |               |           | Healthy Volunteers |           |               |           |               |           |               |           |
|---------|---------------|-----------|----------------|-----------|---------------|-----------|--------------------|-----------|---------------|-----------|---------------|-----------|---------------|-----------|
|         | 2mg           |           | 4mg            |           | 8mg           |           | 1.2mg              |           | 4mg           |           | 8mg           |           | 16 mg         |           |
|         | Iron<br>µg/dl | TSAT<br>% | Iron/<br>µg/dl | TSAT<br>% | Iron<br>µg/dl | TSAT<br>% | Iron<br>µg/dl      | TSAT<br>% | Iron<br>µg/dl | TSAT<br>% | Iron<br>µg/dl | TSAT<br>% | Iron<br>µg/dl | TSAT<br>% |
| 0 h     | 60.2          | 23.3      | 79.5           | 28.7      | 104.3         | 32.8      | 21.8               | 37.7      | 20.1          | 36.0      | 21.5          | 40.7      | 19.6          | 33.0      |
| 4/5h*   | 117.3         | 49.3      | 150.0          | 58.3      | 184.7         | 62.2      | 24.5               | 45.0      | 22.9          | 42.5      | 27.6          | 52.8      | 24.6          | 42.7      |
| 18/19h* | 149.6         | 63.6      | 205.7          | 79.7      | 251.5         | 84.0      | 27.2               | 48.7      | 20.8          | 36.7      | 19.9          | 39.0      | 20.5          | 35.2      |
| 24/29h* | 109.0         | 46.0      | 162.0          | 80.8      | 247.0         | 85.7      | 27.2               | 47.3      | 23.2          | 38.5      | 22.1          | 42.0      | 22.0          | 37.5      |
| 44/48h* | 64.0          | 27.3      | 157.2          | 64.0      | 234.0         | 83.2      | 16.6               | 29.0      | 30.4          | 53.0      | 29.2          | 54.0      | 31.9          | 54.2      |
| 72h     | 66.7          | 27.7      | 85.7           | 31.8      | 209.5         | 74.7      | 16.5               | 28.0      | 22.3          | 39.7      | 31.9          | 58.3      | 33.8          | 55.8      |
| 120h    | 59.7          | 25.2      | 71.5           | 29.2      | 70.0          | 24.3      | 21.2               | 36.8      | 21.1          | 36.0      | 18.5          | 33.8      | 35.5          | 60.0      |
| 168h    | 61.2          | 25.8      | 58.3           | 23.0      | 56.0          | 19.5      |                    |           |               |           |               |           |               |           |
| 240h    |               |           |                |           |               |           | 16.3               | 28.0      | 16.6          | 29.3      | 12.7          | 22.5      | 18.5          | 33.3      |
| 336h    | 66.3          | 27.8      | 57.2           | 21.8      | 77.2          | 26.7      |                    |           |               |           |               |           |               |           |
| 505h    | 55.7          | 24.2      | 59.0           | 21.5      | 66.5          | 22.3      |                    |           |               |           |               |           |               |           |
| 672h    | 58.3          | 24.3      | 61.7           | 22.8      | 71.0          | 24.2      | 17.1               | 27.2      | 21.2          | 35.3      | 13.0          | 22.2      | 17.0          | 27.8      |

\*In CKD patients, Iron and TSAT were assessed at 5, 19, 29 and 44 hours, in healthy volunteers at 4, 18, 24 and 48 hours
