# Supplementary material for: First-in-human Phase I studies of PRS-080#22, a hepcidin antagonist, in healthy volunteers and patients with chronic kidney disease undergoing hemodialysis
Source: PubMed Central journal article supplement (PMC6436791; doi:10.1371/journal.pone.0212023), 2019-03-27
Supplement: pone.0212023.s013.pdf [file pone.0212023.s013.pdf]

| Time    | CKD patients |        |        |        | Healthy volunteers |        |       |       |
|---------|--------------|--------|--------|--------|--------------------|--------|-------|-------|
|         | Placebo      | 2 mg   | 4 mg   | 8 mg   | 1.2 mg             | 4 mg   | 8 mg  | 16 mg |
| 1/2 h*  | -47.8        | -27.2  | 43.8   | 19.2   | -5.55              | -2.83  | 1.08  | -1.67 |
| 4/5h*   | -12.2        | -70.2  | 13.8   | 75.2   | -2.95              | 0.08   | 1.05  | 1.95  |
| 18/19h* | -36.7        | -20.4  | 46.5   | 51.2   | 0.17               | 2.33   | 1.87  | 12.93 |
| 24/29h* | -29.8        | -43.0  | 1.3    | 55.0   | 1.30               | 1.45   | 0.70  | 17.23 |
| 44/48h* | -68.5        | -55.3  | 4.3    | 29.7   | -4.63              | -9.53  | -6.85 | 10.32 |
| 72h     | -101.8       | -67.7  | -16.1  | 14.7   | -1.37              | -16.23 | -7.67 | 0.47  |
| 120h    | -194.7       | -57.3  | -15.1  | -71.7  | 2.82               | -12.75 | -3.75 | 11.93 |
| 168h    | -164.5       | -93.5  | -93.8  | -148.8 |                    |        |       |       |
| 240h    |              |        |        |        | -8.15              | -15.03 | 5.43  | -9.45 |
| 336h    | -131.7       | -79.9  | -131.5 | -120.5 |                    |        |       |       |
| 505h    | -137.3       | -129.7 | -47.0  | -146.2 |                    |        |       |       |
