# Supplementary material for: First-in-human Phase I studies of PRS-080#22, a hepcidin antagonist, in healthy volunteers and patients with chronic kidney disease undergoing hemodialysis
Source: PubMed Central journal article supplement (PMC6436791; doi:10.1371/journal.pone.0212023), 2019-03-27
Supplement: pone.0212023.s014.pdf [file pone.0212023.s014.pdf]

| Scheduled Study Time | Statistics | 0.08 mg (N=6) | 0.4 mg (N=6) | 1.2 mg (N=6) | 4 mg (N=6) | 8 mg (N=6) | 16 mg (N=6) | Placebo (N=12) |
|----------------------|------------|---------------|--------------|--------------|------------|------------|-------------|----------------|
| Day 1, pre-dose      | n          | 6             | 6            | 6            | 6          | 6          | 6           | 12             |
|                      | Mean       | 3.925         | 1.675        | 2.057        | 2.307      | 1.078      | 6.140       | 2.387          |
|                      | SD         | 3.6515        | 0.9143       | 2.3484       | 2.1989     | 1.3822     | 12.0522     | 2.1719         |
|                      | CV%        | 93.0          | 54.6         | 114.2        | 95.3       | 128.2      | 196.3       | 91.0           |
|                      | Minimum    | 0.25          | 0.76         | 0.25         | 0.25       | 0.25       | 0.25        | 0.25           |
|                      | Median     | 2.960         | 1.485        | 0.955        | 1.925      | 0.590      | 1.380       | 1.465          |
|                      | Maximum    | 8.38          | 2.76         | 5.56         | 5.68       | 3.81       | 30.70       | 5.74           |
| Day 1, 1h            | n          | 6             | 6            | 6            | 6          | 6          | 6           | 12             |
|                      | Mean       | 2.167         | 0.250        | 0.250        | 0.250      | 0.250      | 0.677       | 3.540          |
|                      | SD         | 2.2006        | 0.0000       | 0.0000       | 0.0000     | 0.0000     | 1.0451      | 3.6645         |
|                      | CV%        | 101.6         | 0.0          | 0.0          | 0.0        | 0.0        | 154.5       | 103.5          |
|                      | Minimum    | 0.25          | 0.25         | 0.25         | 0.25       | 0.25       | 0.25        | 0.25           |
|                      | Median     | 1.585         | 0.250        | 0.250        | 0.250      | 0.250      | 0.250       | 1.890          |
|                      | Maximum    | 4.93          | 0.25         | 0.25         | 0.25       | 0.25       | 2.81        | 10.10          |
| Day 1, 6h            | n          | 6             | 6            | 6            | 6          | 6          | 6           | 12             |
|                      | Mean       | 5.787         | 0.250        | 0.250        | 0.365      | 0.458      | 1.073       | 6.575          |
|                      | SD         | 4.6589        | 0.0000       | 0.0000       | 0.2817     | 0.3262     | 1.2742      | 5.7550         |
|                      | CV%        | 80.5          | 0.0          | 0.0          | 77.2       | 71.2       | 118.7       | 87.5           |
|                      | Minimum    | 0.25          | 0.25         | 0.25         | 0.25       | 0.25       | 0.25        | 0.25           |
|                      | Median     | 5.765         | 0.250        | 0.250        | 0.250      | 0.250      | 0.755       | 4.170          |
|                      | Maximum    | 11.90         | 0.25         | 0.25         | 0.94       | 0.95       | 3.62        | 14.90          |
| Day 2, 18h           | n          | 6             | 6            | 6            | 6          | 6          | 6           | 12             |
|                      | Mean       | 3.960         | 8.198        | 0.815        | 1.047      | 1.118      | 2.635       | 2.449          |
|                      | SD         | 1.7639        | 7.7476       | 0.7213       | 0.9066     | 1.0164     | 2.3656      | 1.8513         |
|                      | CV%        | 44.5          | 94.5         | 88.5         | 86.6       | 90.9       | 89.8        | 75.6           |
|                      | Minimum    | 1.95          | 0.25         | 0.25         | 0.25       | 0.25       | 0.25        | 0.25           |
|                      | Median     | 3.520         | 7.725        | 0.515        | 0.880      | 0.785      | 1.510       | 2.280          |
|                      | Maximum    | 6.70          | 17.70        | 1.95         | 2.27       | 2.64       | 5.90        | 6.89           |
| Day 3, 48h           | n          | 6             | 6            | 6            | 6          | 6          | 6           | 12             |
|                      | Mean       | 2.442         | 4.060        | 10.038       | 2.537      | 2.305      | 6.740       | 1.772          |
|                      | SD         | 2.1846        | 1.9718       | 11.9604      | 2.5947     | 2.8913     | 12.5187     | 1.9017         |
|                      | CV%        | 89.5          | 48.6         | 119.1        | 102.3      | 125.4      | 185.7       | 107.3          |
|                      | Minimum    | 0.83          | 0.25         | 0.25         | 0.25       | 0.25       | 0.25        | 0.25           |
|                      | Median     | 1.770         | 4.565        | 5.115        | 1.975      | 0.650      | 1.780       | 1.355          |
|                      | Maximum    | 6.82          | 5.90         | 26.00        | 5.83       | 6.13       | 32.20       | 6.92           |

| Scheduled Study Time | Statistics | 0.08 mg (N=6) | 0.4 mg (N=6) | 1.2 mg (N=6) | 4 mg (N=6) | 8 mg (N=6) | 16 mg (N=6) | Placebo (N=12) |
|----------------------|------------|---------------|--------------|--------------|------------|------------|-------------|----------------|
| Day 4, 72h           | n          | 6             | 6            | 6            | 6          | 6          | 6           | 12             |
|                      | Mean       | 2.178         | 3.870        | 7.840        | 19.790     | 28.247     | 48.177      | 1.831          |
|                      | SD         | 1.6146        | 1.9401       | 8.3772       | 29.1053    | 66.0279    | 111.6203    | 2.6482         |
|                      | CV%        | 74.1          | 50.1         | 106.9        | 147.1      | 232.8      | 231.7       | 144.6          |
|                      | Minimum    | 1.04          | 0.25         | 0.25         | 0.25       | 0.25       | 0.54        | 0.25           |
|                      | Median     | 1.645         | 4.285        | 6.620        | 2.220      | 1.465      | 3.340       | 0.875          |
|                      | Maximum    | 5.43          | 6.05         | 19.60        | 63.70      | 163.00     | 276.00      | 9.78           |
| Day 6, 120h          | n          | 6             | 6            | 6            | 6          | 6          | 6           | 12             |
|                      | Mean       | 2.017         | 2.668        | 5.808        | 8.157      | 28.930     | 33.532      | 3.057          |
|                      | SD         | 1.5792        | 0.5524       | 5.2272       | 10.8022    | 41.4495    | 73.2353     | 4.7573         |
|                      | CV%        | 78.3          | 20.7         | 90.0         | 132.4      | 143.3      | 218.4       | 155.6          |
|                      | Minimum    | 0.66          | 1.88         | 0.25         | 0.25       | 0.25       | 2.16        | 0.25           |
|                      | Median     | 1.765         | 2.830        | 5.705        | 2.220      | 6.540      | 3.620       | 0.765          |
|                      | Maximum    | 4.97          | 3.38         | 13.20        | 22.40      | 98.40      | 183.00      | 13.00          |
| Day 11, 240h         | n          | 6             | 6            | 6            | 6          | 6          | 6           | 12             |
|                      | Mean       | 1.133         | 3.665        | 2.443        | 5.218      | 21.045     | 38.527      | 0.572          |
|                      | SD         | 0.8986        | 5.3707       | 2.2024       | 5.0327     | 23.1410    | 30.6146     | 0.4442         |
|                      | CV%        | 79.3          | 146.5        | 90.1         | 96.4       | 110.0      | 79.5        | 77.7           |
|                      | Minimum    | 0.25          | 0.66         | 0.25         | 0.25       | 0.25       | 2.42        | 0.25           |
|                      | Median     | 0.985         | 1.415        | 2.325        | 4.675      | 17.985     | 42.500      | 0.250          |
|                      | Maximum    | 2.87          | 14.50        | 5.92         | 13.30      | 62.30      | 83.50       | 1.35           |
| Day 28               | n          | 6             | 6            | 6            | 6          | 6          | 6           | 12             |
|                      | Mean       | 1.162         | 2.140        | 2.012        | 2.183      | 6.593      | 4.760       | 2.531          |
|                      | SD         | 0.7076        | 1.1040       | 3.8239       | 2.0151     | 10.8100    | 2.8559      | 4.6268         |
|                      | CV%        | 60.9          | 51.6         | 190.1        | 92.3       | 164.0      | 60.0        | 182.8          |
|                      | Minimum    | 0.25          | 0.94         | 0.25         | 0.25       | 0.25       | 0.25        | 0.25           |
|                      | Median     | 0.960         | 2.050        | 0.250        | 1.650      | 3.335      | 5.020       | 0.515          |
|                      | Maximum    | 2.09          | 3.32         | 9.77         | 4.86       | 28.40      | 7.43        | 14.10          |

Note that days were counted differently in the two studies, therefore hours are provided additionally, day 28 = 672 hours.
