# Supplementary material for: First-in-human Phase I studies of PRS-080#22, a hepcidin antagonist, in healthy volunteers and patients with chronic kidney disease undergoing hemodialysis
Source: PubMed Central journal article supplement (PMC6436791; doi:10.1371/journal.pone.0212023), 2019-03-27
Supplement: pone.0212023.s015.pdf [file pone.0212023.s015.pdf]

|                  |           | Hepcidin plasma level [nM] |         |        |        |         |              |        |              |         |
|------------------|-----------|----------------------------|---------|--------|--------|---------|--------------|--------|--------------|---------|
|                  |           | N                          | missing | mean   | SD     | minimum | 1st quartile | median | 3rd quartile | maximum |
| Visit            | Treatment |                            |         |        |        |         |              |        |              |         |
| Day 0 - pre-dose | Treatment |                            |         |        |        |         |              |        |              |         |
|                  | Placebo   | 6                          | 0       | 15.880 | 9.010  | 6.20    | 9.380        | 13.450 | 22.400       | 30.40   |
|                  | 2 mg/kg   | 6                          | 0       | 7.377  | 8.544  | 0.68    | 1.560        | 4.010  | 10.900       | 23.10   |
|                  | 4 mg/kg   | 6                          | 0       | 14.367 | 17.291 | 2.06    | 2.410        | 7.215  | 20.700       | 46.60   |
|                  | 8 mg/kg   | 6                          | 0       | 21.117 | 4.477  | 15.90   | 16.700       | 20.900 | 25.000       | 27.30   |
|                  | Total     | 24                         | 0       | 14.685 | 11.313 | 0.68    | 4.775        | 13.450 | 21.750       | 46.60   |
| Day 0 - 1h       | Treatment |                            |         |        |        |         |              |        |              |         |
|                  | Placebo   | 6                          | 0       | 20.057 | 10.632 | 7.04    | 13.200       | 18.100 | 29.300       | 34.60   |
|                  | 2 mg/kg   | 6                          | 0       | 3.045  | 6.235  | 0.00    | 0.000        | 0.490  | 1.590        | 15.70   |
|                  | 4 mg/kg   | 6                          | 0       | 0.782  | 0.935  | 0.00    | 0.000        | 0.535  | 1.400        | 2.22    |
|                  | 8 mg/kg   | 6                          | 0       | 1.137  | 0.672  | 0.00    | 0.970        | 1.125  | 1.690        | 1.91    |
|                  | Total     | 24                         | 0       | 6.255  | 10.017 | 0.00    | 0.000        | 1.325  | 10.120       | 34.60   |
| Day 0 - 5h       | Treatment |                            |         |        |        |         |              |        |              |         |
|                  | Placebo   | 6                          | 0       | 27.000 | 14.598 | 10.40   | 18.900       | 23.350 | 34.400       | 51.60   |
|                  | 2 mg/kg   | 6                          | 0       | 9.313  | 20.538 | 0.00    | 0.000        | 1.325  | 2.030        | 51.20   |
|                  | 4 mg/kg   | 6                          | 0       | 1.563  | 2.275  | 0.00    | 0.000        | 0.685  | 2.190        | 5.82    |
|                  | 8 mg/kg   | 6                          | 0       | 1.643  | 0.556  | 0.94    | 1.140        | 1.700  | 2.150        | 2.23    |
|                  | Total     | 24                         | 0       | 9.880  | 15.859 | 0.00    | 0.895        | 2.020  | 14.650       | 51.60   |
| Day 1 - 19h      | Treatment |                            |         |        |        |         |              |        |              |         |
|                  | Placebo   | 6                          | 0       | 18.955 | 7.884  | 8.13    | 11.700       | 20.450 | 23.200       | 29.80   |
|                  | 2 mg/kg   | 5                          | 0       | 50.084 | 31.568 | 8.82    | 38.100       | 40.900 | 74.000       | 88.60   |
|                  | 4 mg/kg   | 6                          | 0       | 13.982 | 18.530 | 4.12    | 4.330        | 7.300  | 9.340        | 51.50   |
|                  | 8 mg/kg   | 6                          | 0       | 12.078 | 3.063  | 8.48    | 9.890        | 11.300 | 15.700       | 15.80   |
|                  | Total     | 23                         | 0       | 22.631 | 22.388 | 4.12    | 8.820        | 12.000 | 29.800       | 88.60   |

|               |                  | Hepcidin plasma level [nM] |         |         |        |         |              |         |              |         |
|---------------|------------------|----------------------------|---------|---------|--------|---------|--------------|---------|--------------|---------|
|               |                  | N                          | missing | mean    | SD     | minimum | 1st quartile | median  | 3rd quartile | maximum |
| Day 2 - 48h   | <b>Treatment</b> |                            |         |         |        |         |              |         |              |         |
|               | Placebo          | 6                          | 0       | 20.303  | 12.708 | 7.32    | 11.800       | 15.700  | 31.200       | 40.10   |
|               | 2 mg/kg          | 6                          | 0       | 42.383  | 7.254  | 33.20   | 34.800       | 43.800  | 46.200       | 52.50   |
|               | 4 mg/kg          | 5                          | 1       | 75.042  | 45.185 | 9.31    | 53.800       | 81.100  | 109.000      | 122.00  |
|               | 8 mg/kg          | 6                          | 0       | 62.333  | 46.746 | 25.40   | 27.600       | 39.500  | 107.000      | 135.00  |
|               | <b>Total</b>     | 23                         | 1       | 48.927  | 36.819 | 7.32    | 25.400       | 40.100  | 53.800       | 135.00  |
| Day 3 - 72h   | <b>Treatment</b> |                            |         |         |        |         |              |         |              |         |
|               | Placebo          | 6                          | 0       | 18.742  | 10.749 | 7.53    | 8.820        | 17.550  | 28.800       | 32.20   |
|               | 2 mg/kg          | 6                          | 0       | 48.017  | 22.190 | 22.60   | 38.600       | 44.400  | 49.500       | 88.60   |
|               | 4 mg/kg          | 6                          | 0       | 74.817  | 40.247 | 10.70   | 56.400       | 75.400  | 111.000      | 120.00  |
|               | 8 mg/kg          | 6                          | 0       | 123.783 | 52.823 | 73.80   | 89.500       | 111.700 | 137.000      | 219.00  |
|               | <b>Total</b>     | 24                         | 0       | 66.340  | 51.469 | 7.53    | 26.100       | 52.950  | 90.950       | 219.00  |
| Day 5 – 120h  | <b>Treatment</b> |                            |         |         |        |         |              |         |              |         |
|               | Placebo          | 6                          | 0       | 24.503  | 14.676 | 7.94    | 9.980        | 23.850  | 38.600       | 42.80   |
|               | 2 mg/kg          | 6                          | 0       | 44.250  | 30.751 | 20.10   | 22.600       | 35.400  | 50.000       | 102.00  |
|               | 4 mg/kg          | 6                          | 0       | 69.067  | 32.577 | 34.30   | 48.700       | 58.250  | 91.900       | 123.00  |
|               | 8 mg/kg          | 6                          | 0       | 124.733 | 32.731 | 86.40   | 110.000      | 119.500 | 129.000      | 184.00  |
|               | <b>Total</b>     | 24                         | 0       | 65.638  | 46.806 | 7.94    | 27.950       | 49.350  | 106.000      | 184.00  |
| Day 14 – 240h | <b>Treatment</b> |                            |         |         |        |         |              |         |              |         |
|               | Placebo          | 6                          | 0       | 27.200  | 4.177  | 20.50   | 25.800       | 27.350  | 28.900       | 33.30   |
|               | 2 mg/kg          | 6                          | 0       | 28.300  | 13.167 | 12.70   | 15.700       | 27.350  | 41.500       | 45.20   |
|               | 4 mg/kg          | 6                          | 0       | 34.550  | 10.529 | 19.90   | 29.600       | 32.200  | 44.600       | 48.80   |
|               | 8 mg/kg          | 6                          | 0       | 79.883  | 23.065 | 36.20   | 71.900       | 91.100  | 94.100       | 94.90   |
|               | <b>Total</b>     | 24                         | 0       | 42.483  | 25.999 | 12.70   | 26.550       | 32.200  | 47.000       | 94.90   |

|                |                  | Hepcidin plasma level [nM] |         |        |        |         |              |        |              |         |
|----------------|------------------|----------------------------|---------|--------|--------|---------|--------------|--------|--------------|---------|
|                |                  | N                          | missing | mean   | SD     | minimum | 1st quartile | median | 3rd quartile | maximum |
| Day 28 – 672 h | <b>Treatment</b> |                            |         |        |        |         |              |        |              |         |
|                | Placebo          | 6                          | 0       | 23.633 | 14.136 | 13.10   | 15.700       | 16.850 | 29.200       | 50.10   |
|                | 2 mg/kg          | 6                          | 0       | 26.522 | 20.578 | 8.53    | 9.400        | 18.550 | 48.400       | 55.70   |
|                | 4 mg/kg          | 6                          | 0       | 27.050 | 13.724 | 7.00    | 12.300       | 33.600 | 37.600       | 38.20   |
|                | 8 mg/kg          | 6                          | 0       | 47.517 | 11.502 | 32.00   | 35.400       | 50.300 | 56.200       | 60.90   |
|                | <b>Total</b>     | 24                         | 0       | 31.180 | 17.315 | 7.00    | 14.800       | 32.500 | 48.650       | 60.90   |

Note that days were counted differently in the two studies, therefore hours are provided additionally.
