# Supplementary material for: First-in-human Phase I studies of PRS-080#22, a hepcidin antagonist, in healthy volunteers and patients with chronic kidney disease undergoing hemodialysis
Source: PubMed Central journal article supplement (PMC6436791; doi:10.1371/journal.pone.0212023), 2019-03-27
Supplement: pone.0212023.s016.pdf [file pone.0212023.s016.pdf]

| Parameter | Time    | CKD patients |       |       | Healthy volunteers |       |       |       |
|-----------|---------|--------------|-------|-------|--------------------|-------|-------|-------|
|           |         | 2 mg         | 4 mg  | 8 mg  | 1.2 mg             | 4 mg  | 8 mg  | 16 mg |
| Hb g/dl   | 19/24h* | 0.62         | 1.32  | 1.23  | -0.05              | 0.23  | 0.10  | 0.12  |
|           | 44/48h* | 0.02         | 0.42  | 0.57  | -0.17              | 0.1   | 0.13  | -0.12 |
|           | 168h    | -0.40        | 0.06  | 0.25  |                    |       |       |       |
|           | 240h    |              |       |       | -0.15              | -0.08 | 0.10  | -0.32 |
|           | 672h    | -0.58        | 0.30  | 0.48  | 0.10               | 0.12  | 0.22  | 0.07  |
| Ret 0/00  | 19/24h* | -1.26        | -0.84 | 0.05  | 0.01               | 0.08  | 0.02  | -0.01 |
|           | 44/48h* | -3.53        | -0.67 | -0.78 | 0.06               | 0.05  | 0.06  | 0.06  |
|           | 168h    | -1.40        | 0.96  | 2.90  |                    |       |       |       |
|           | 240h    |              |       |       | 0.15               | 0.18  | -0.06 | 0.44  |
|           | 672h    | -2.62        | -0.30 | -0.07 | 0.13               | -0.22 | -0.01 | 0.04  |
| RetHb pg  | 19/24h* | -0.14        | -2.04 | 0.07  | -0.01              | 0.05  | 0.03  | -0.02 |
|           | 44/48h* | -1.10        | -0.13 | 0.83  | 0.02               | -0.02 | 0.05  | 0.03  |
|           | 168h    | 0.5          | -0.16 | 0.83  |                    |       |       |       |
|           | 240h    |              |       |       | -0.03              | -0.05 | -0.03 | 0.05  |
|           | 672h    | -0.77        | 0.43  | 0.10  | -0.07              | -0.03 | -0.13 | -0.02 |

\*In CKD patients, slow response parameters were assessed at 19 and 44 hours, in healthy volunteers at 24 and 48 hours
